# Supplementary figures and images for: Lower Bone Mineral Can Be a Risk for an Enlarging Bone Marrow Lesion: A Longitudinal Cohort Study of Japanese Women Without Radiographic Knee Osteoarthritis
Source: Research Square preprint supplement (doi:10.21203/rs.3.rs-1329362/v1), 2022-02-08

**Additional file 1**


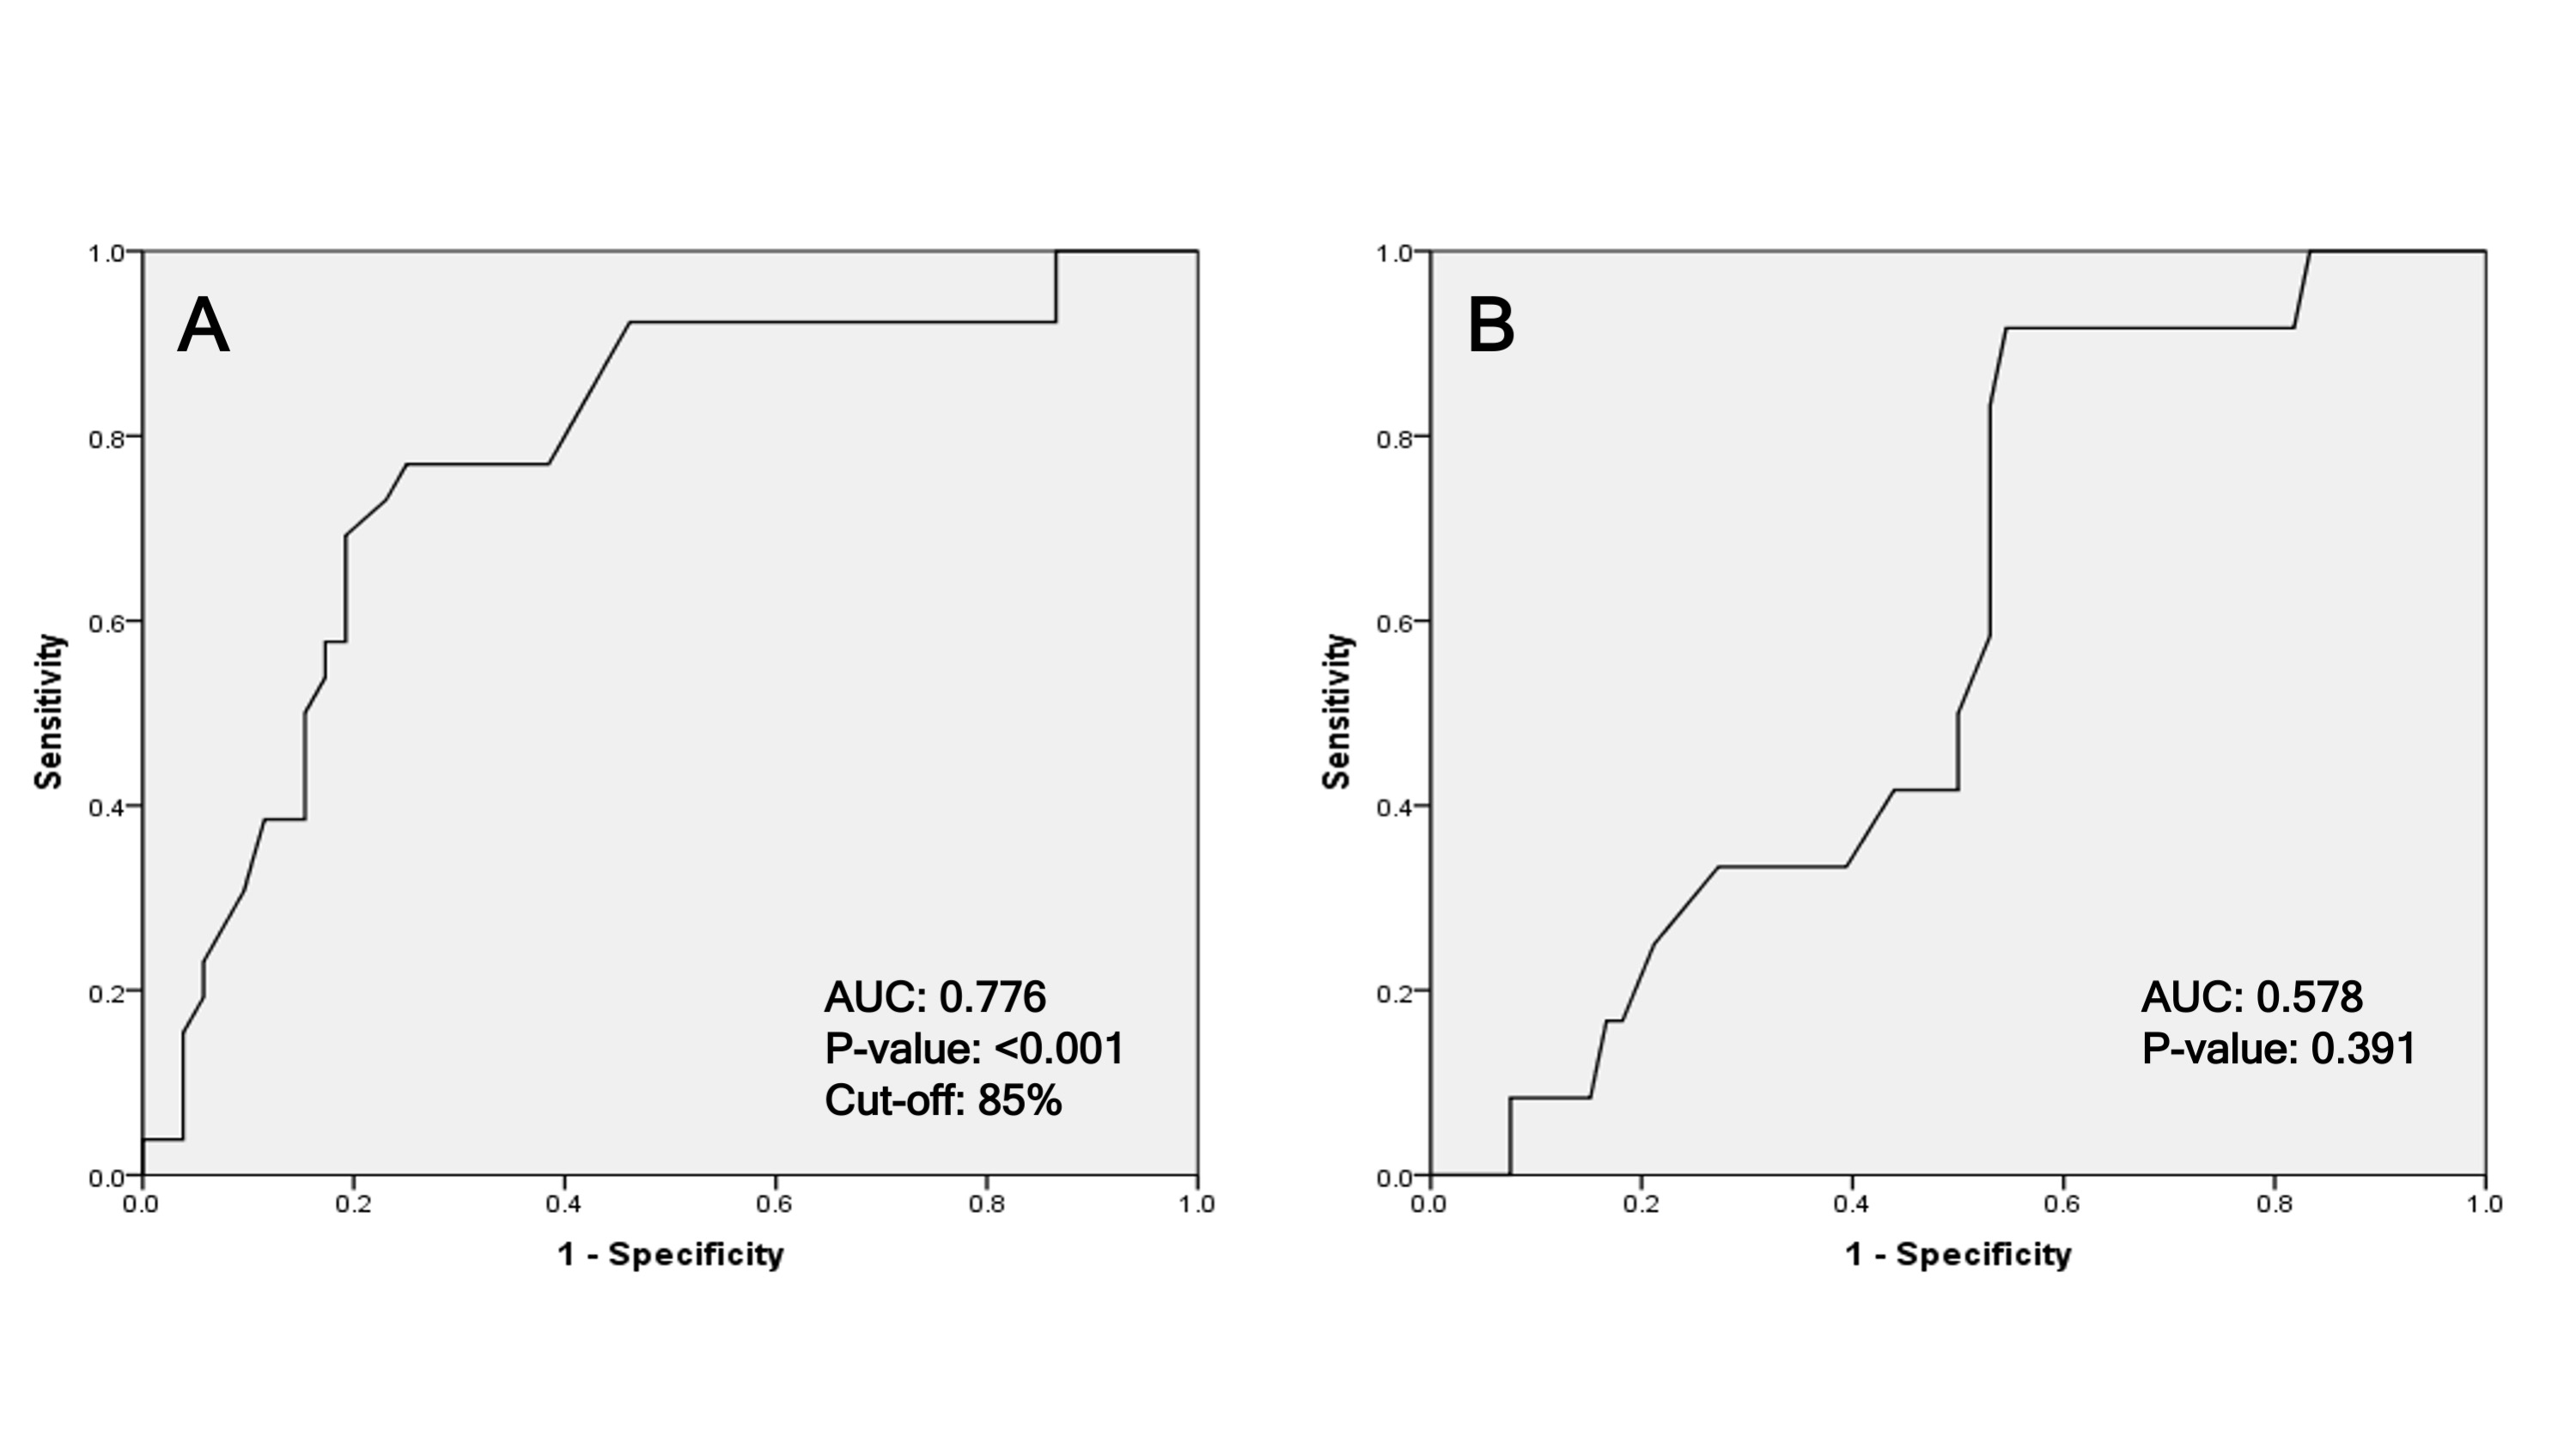

Supplement: Supplementary file 1 [file 058e17c5e33f9dff7f9ec57c.docx]
